# Supplementary material
Source: PubMed Central journal article supplement (PMC7350697)

**Fig. 1****A.** CRISPR-cas9 sgRNA 1 sequence:**AATGTGTACATAACTCCCGCAGG**

CRISPR-cas9 sgRNA 3 sequence:

**CATCATCATAATGGGGCGGCAGG**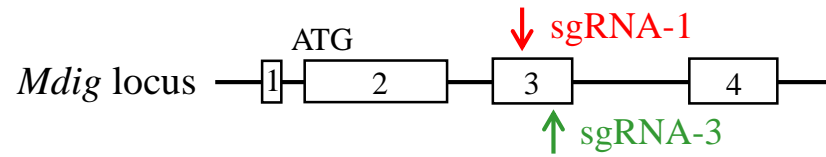**B.**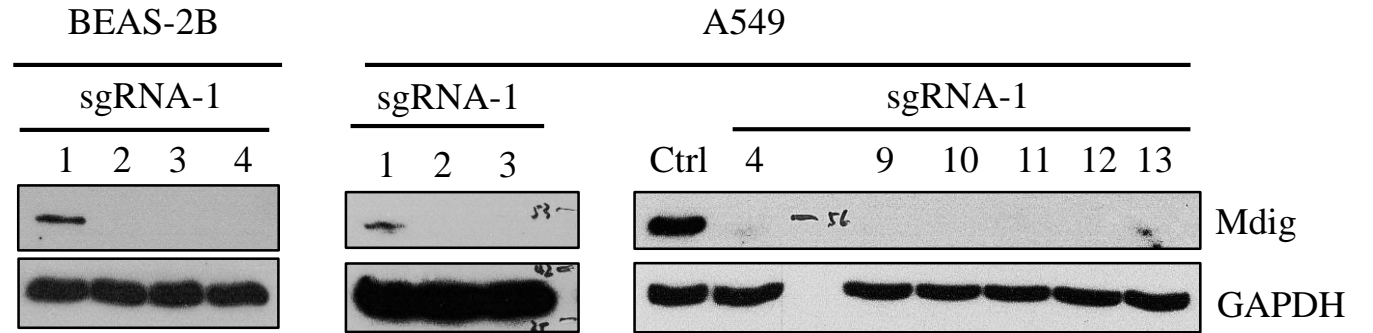**C.**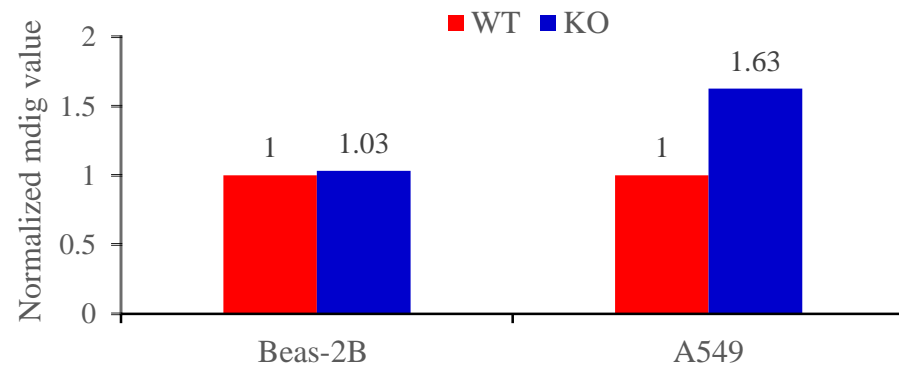**D.**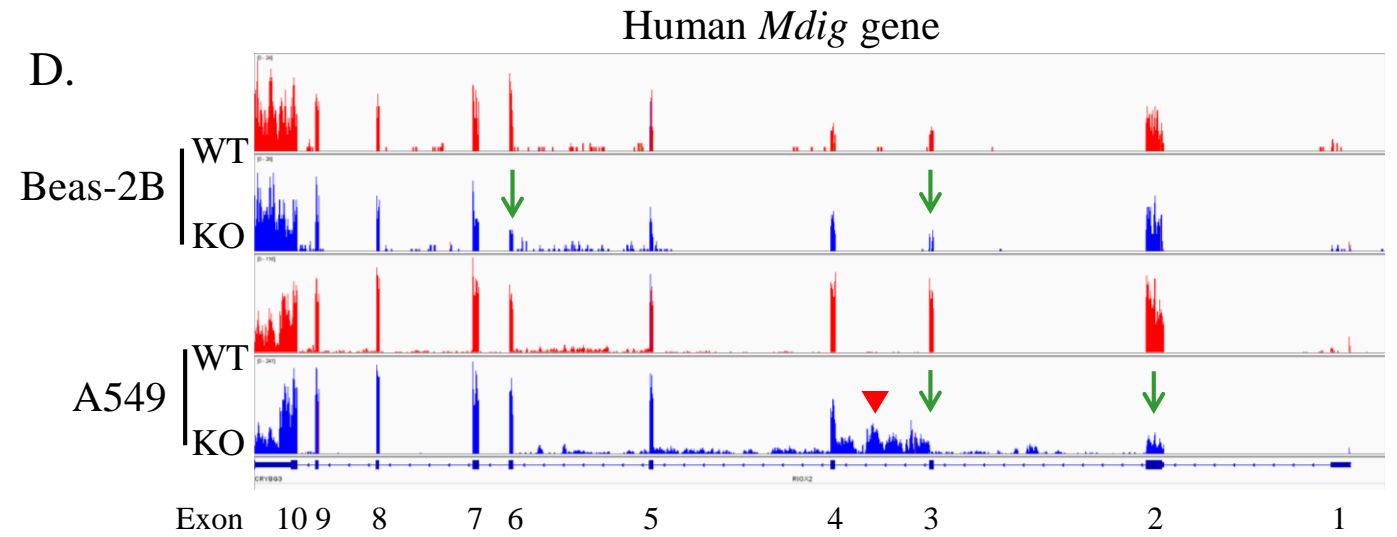

Fig. 2

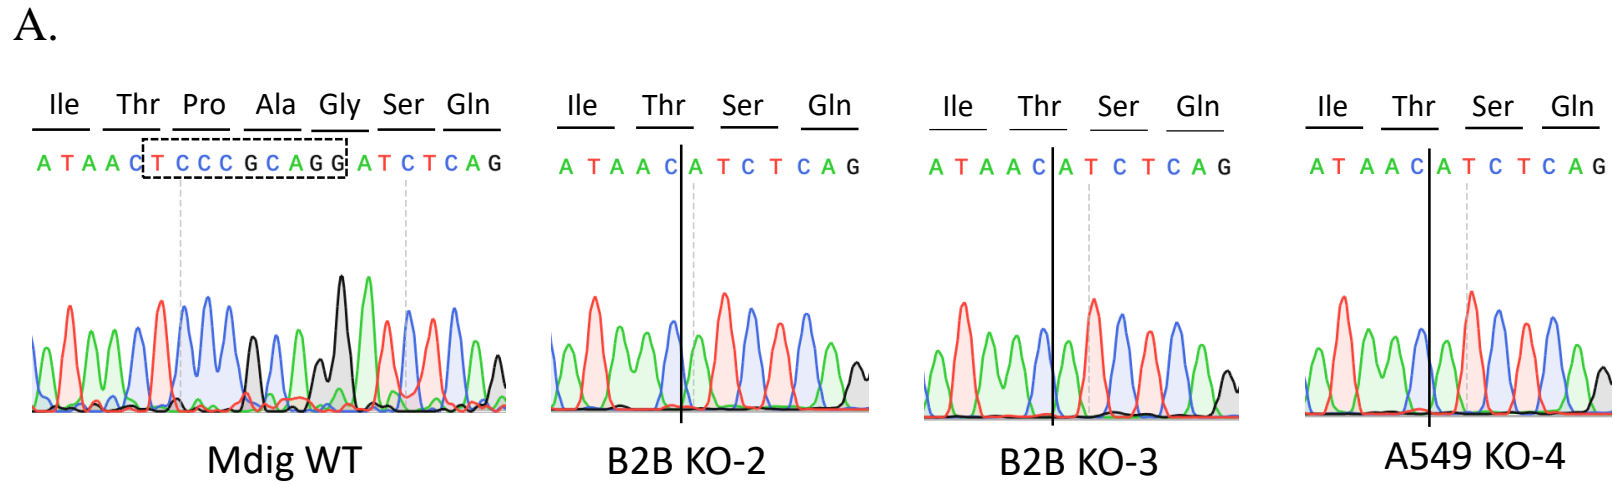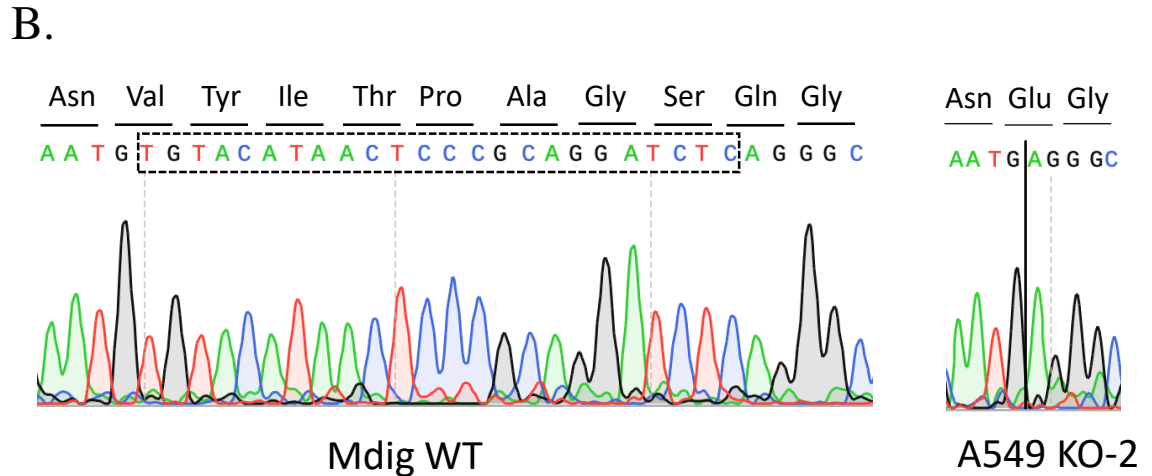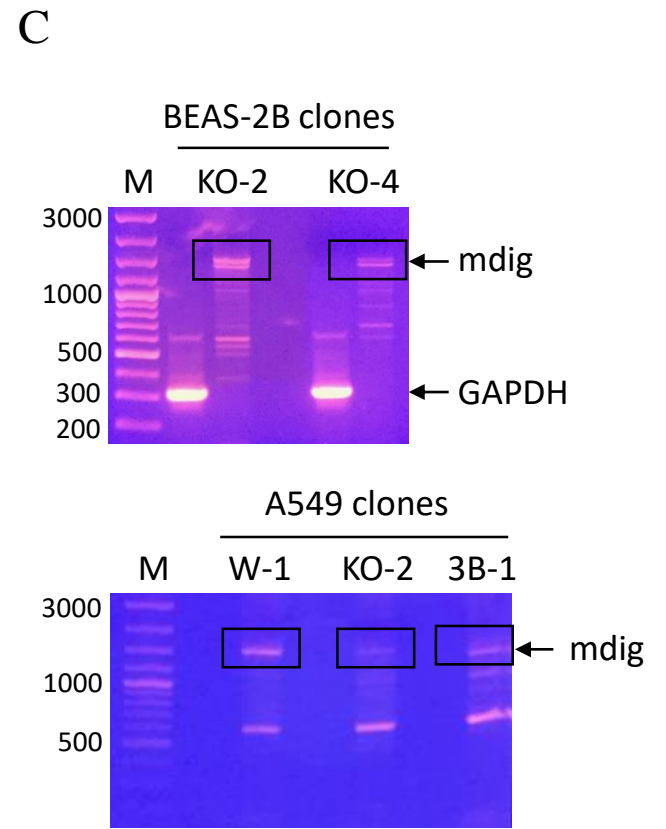

Fig. 3

A.

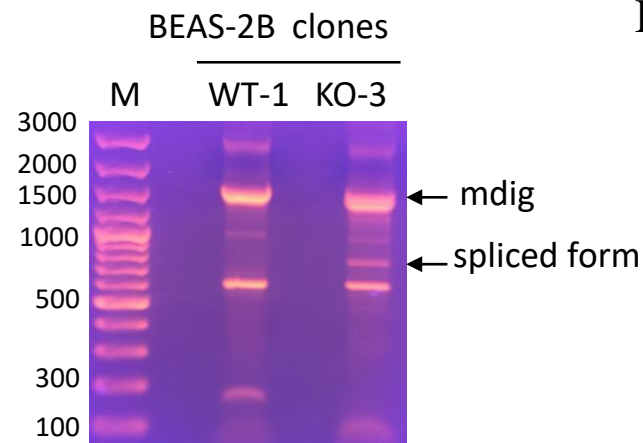

A549 clones

3B-1 3B-2

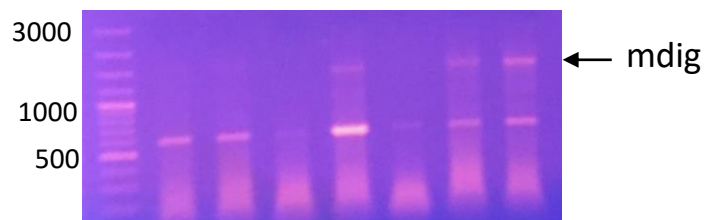

A549 clones

KO-3 KO-4 M

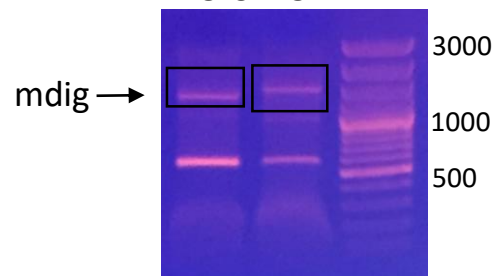

B.

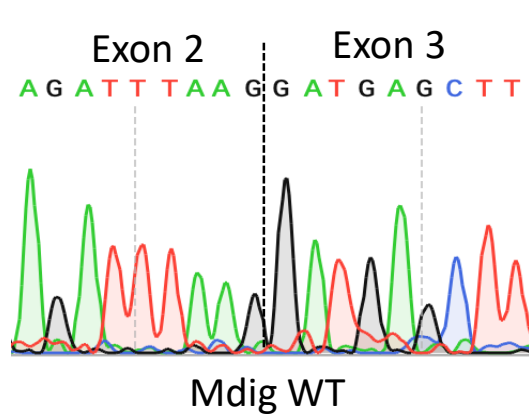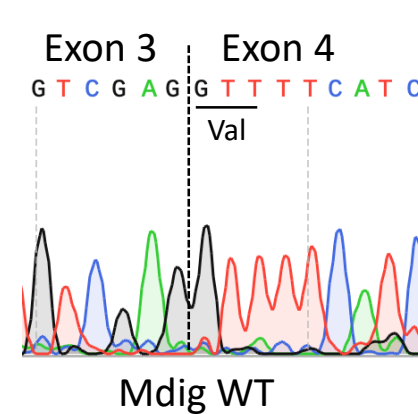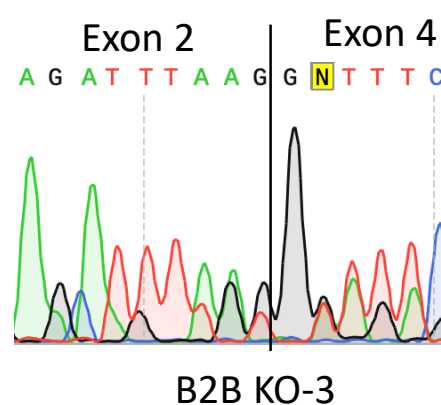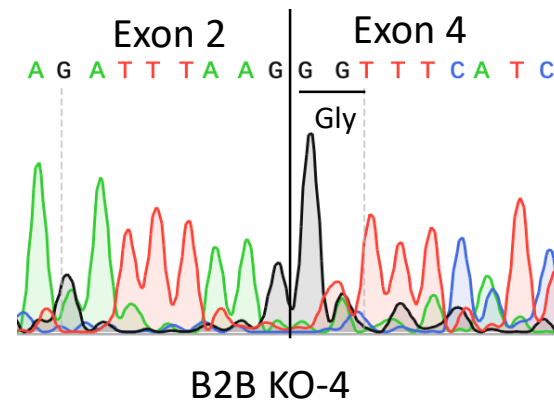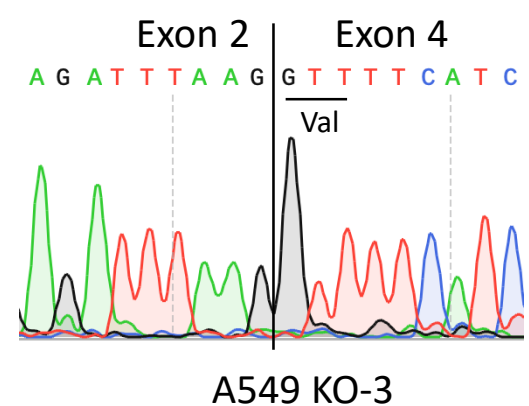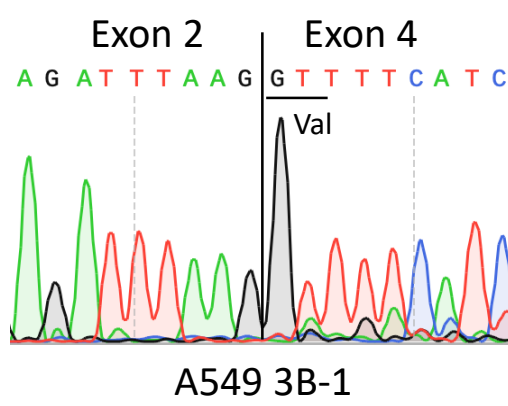

C.

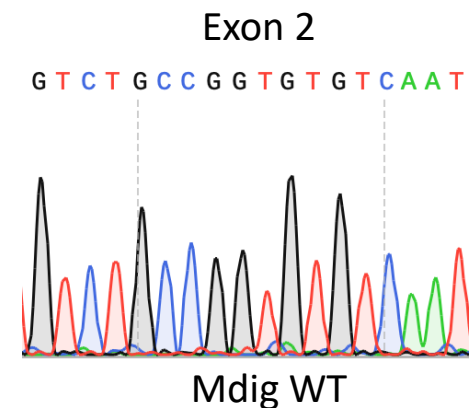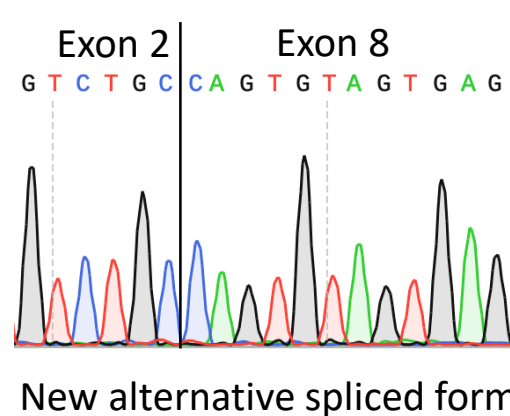

Fig. 4

A.

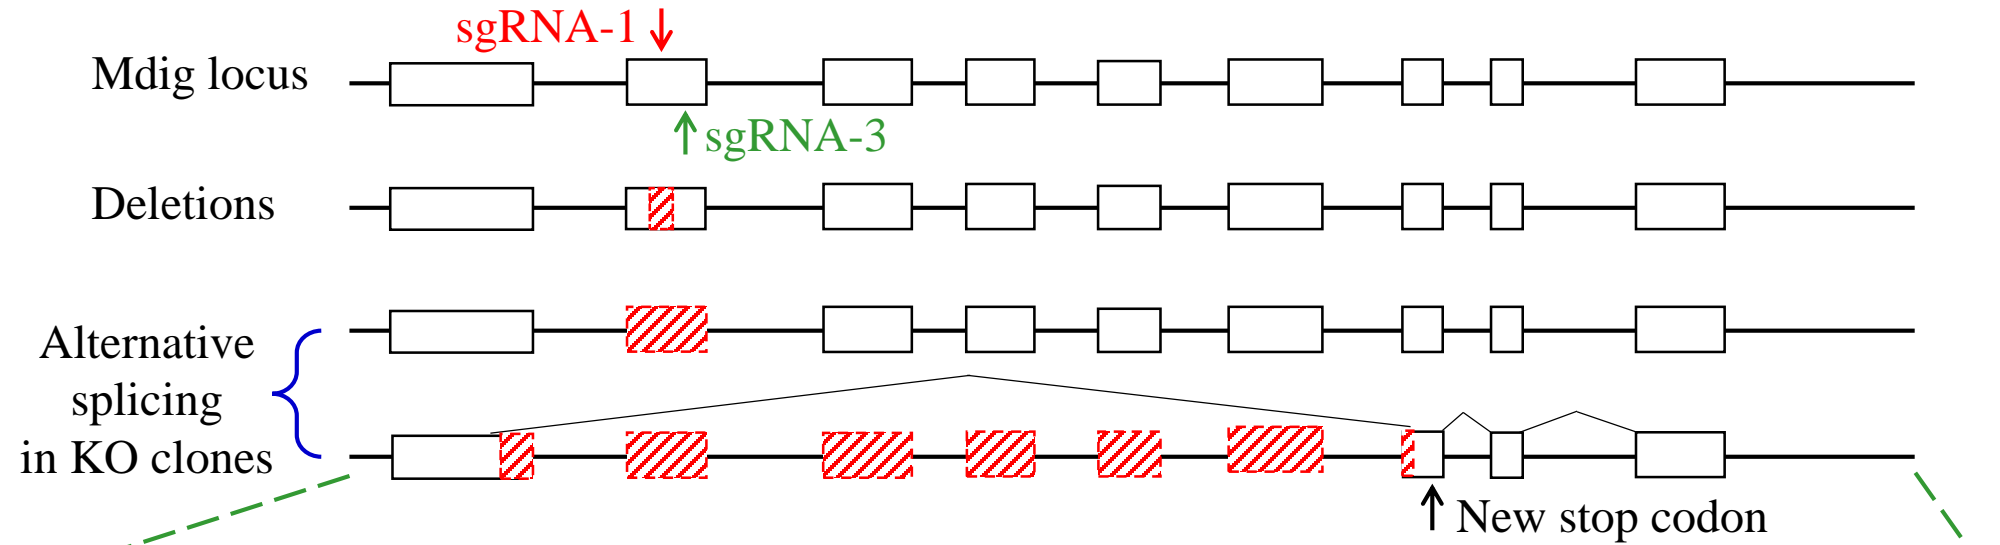

B.

WT MPKKAKPTGSGKEEGPAPCKQMKLEAAGGPSALNFDSPSSLFESLISPIKTETFFKEFWEQKPLLIQRDD  
**KO** MPKKAKPTGSGKEEGPAPCKQMKLEAAGGPSALNFDSPSSLFESLISPIKTETFFKEFWEQKPLLIQRDD  
 PALATYYGSLFKLTDLKSLSRGMYYGRDVNVCRCVNGKKKVLNKDGKAHFLQLRKDFDQKRATIQFHQP  
 PALATYYGSLFKLTDLKSLSRGMYYGRDVNVC-----  
 QRFKDELWRIQEKLECYFGSLVGSNVYITPAGSQGLPPHYDDVEVFILQLEGEKHWRLYHPTVPLAREYS  
 -----  
                                             E                                          G                                            
 -----  
 VEAERIGRPVHEFMLKPGDLLYFPRGTIHQADTPAGLAHSTHVTISTYQNNSWGDFLLDTISGLVFDTA  
 -----  
 KEDVELRTGIPRQLLLQVESTTVATRRLSGFLRTLADRLEGTKELLSSDMKKDFIMHRLPPYSAGDGAEL  
 -----  
 STPGGKLPRLDS**VVRLQFK**DHIVLTVLPDQDQSDEAQEKMVYIYHSLKNSRETHMMGNEEETEFHGLRFP  
 -----  
 -----QCSETAV\* 109  
 LSHLDALKQIWNSPAISVKDLKLTDEEKESLVLSLWTECLIQVV 465

Fig. 5

A. BEAS-2B Exon 5 A to C (NM\_032778, 1330T to G)

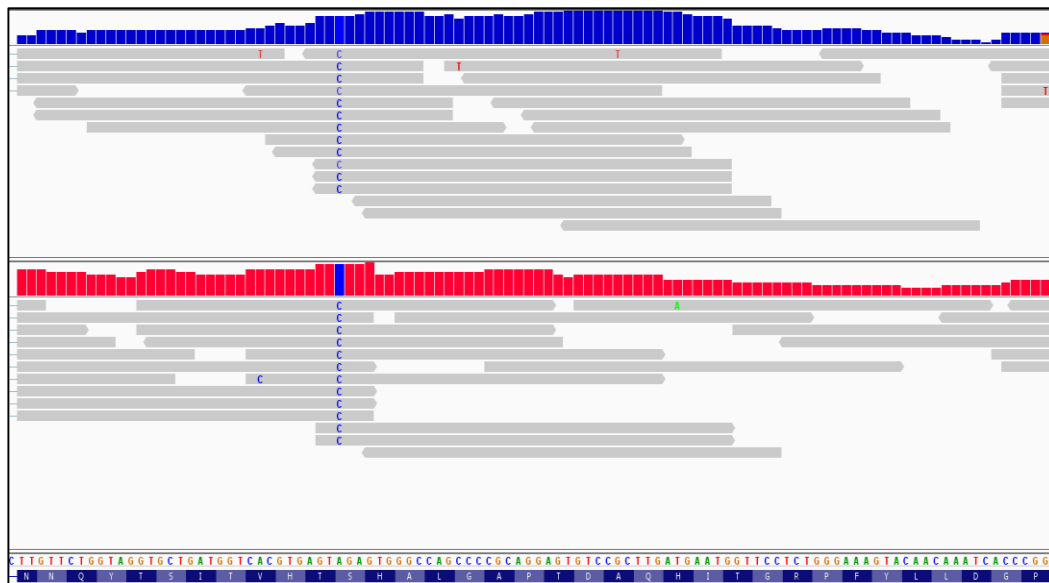

B. A549 Exon 5 A to C (NM\_032778, 1330T to G)

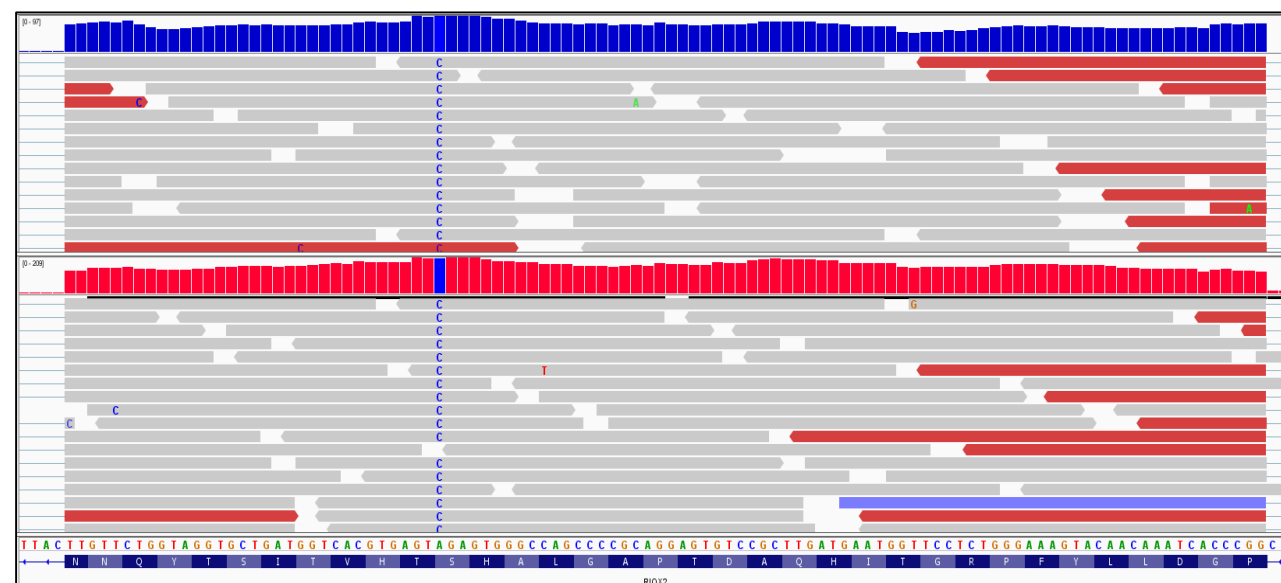

C. BEAS-2B Exon 2 C to G (NM\_032778, 626G to C)

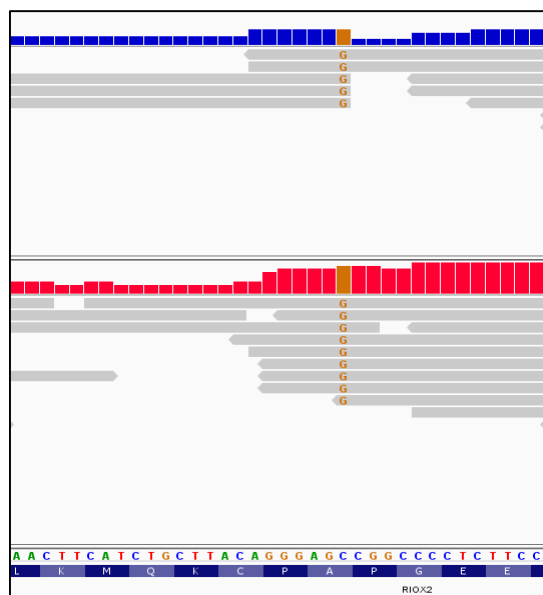

D. A549 Exon 9 C to T (NM\_032778 1730G to A)

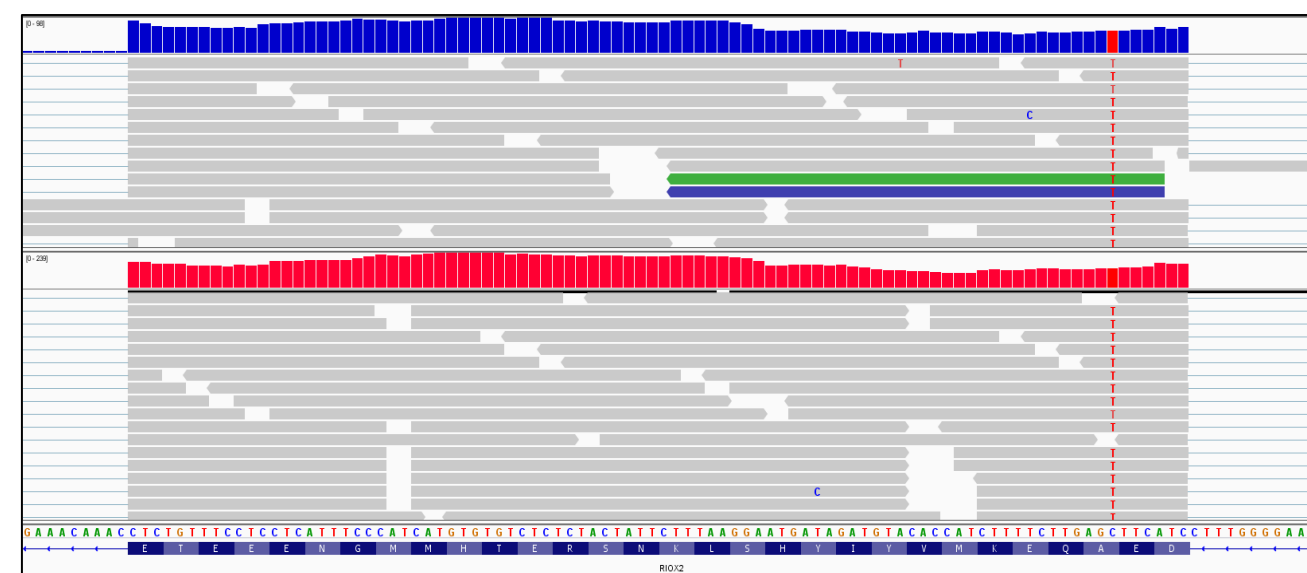

sFig 1

BEAS-2B

A549

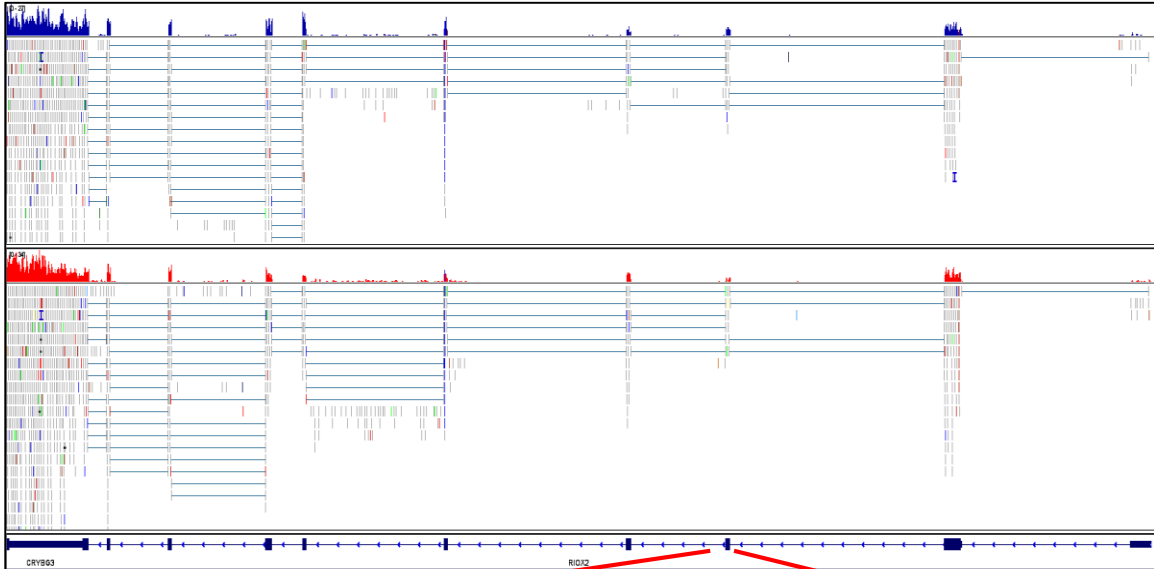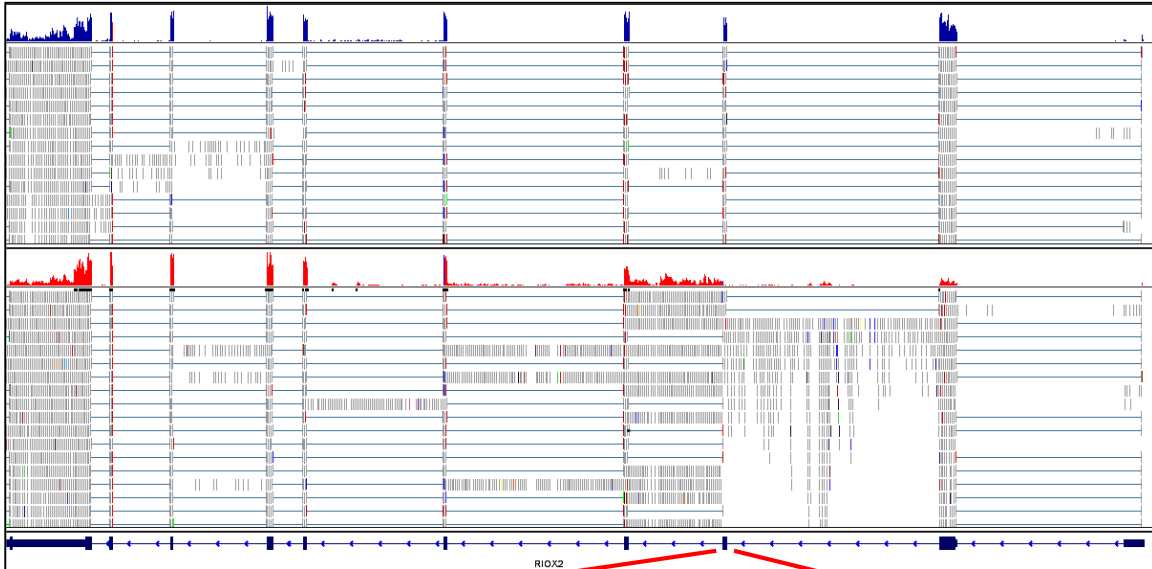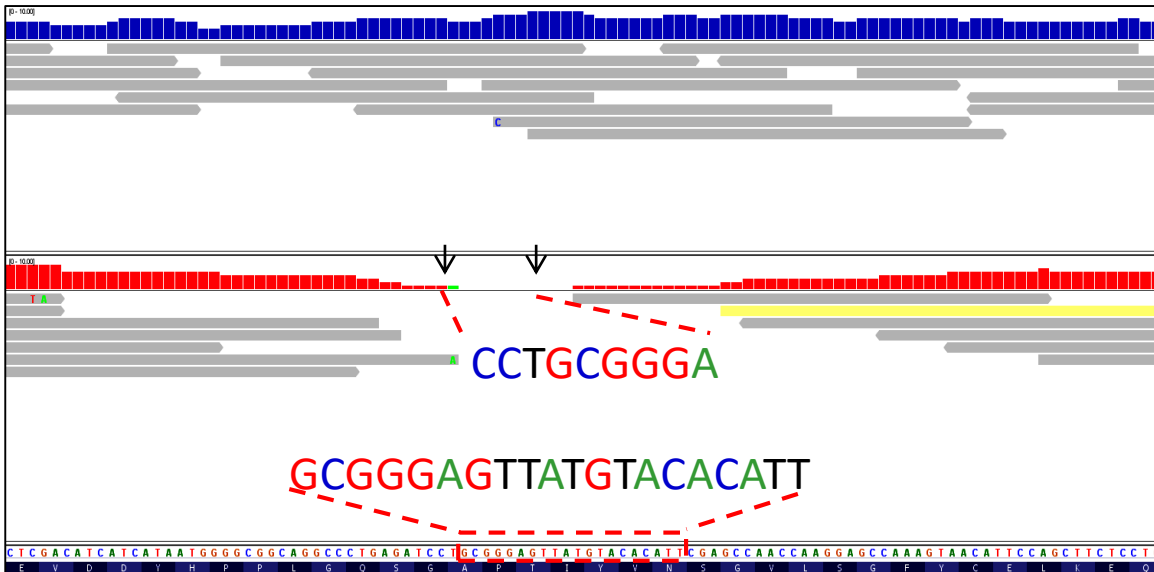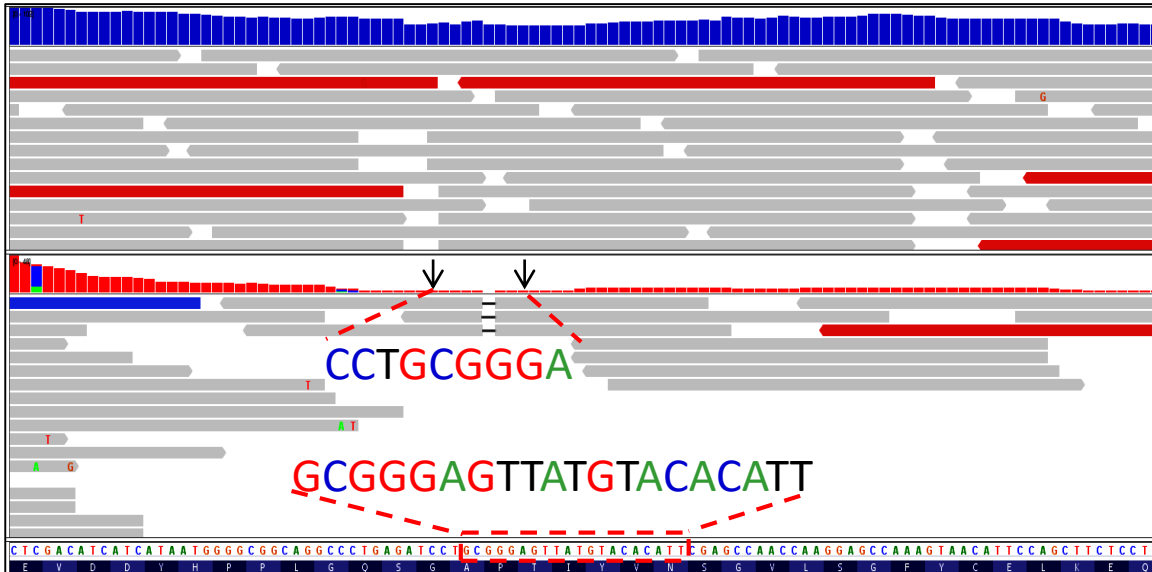

Supplement: NIHMS1598479-supplement-3.pdf [file NIHMS1598479-supplement-3.pdf]
